# Supplementary material
Source: publisher figshare collection journal article supplement (https://acs.figshare.com/ndownloader/files/13549727)
Supplement: Supplementary file 1 [file 13549727]

## Sheet: vivo d=6
		-RBP (uninduced)					+RBP(induced)
positions_relative_to_AUG	positions	mod cond 1	unmod cond 1	mod cond 2	unmod cond 2		mod cond 1	unmod cond 1	mod cond 2	unmod cond 2
-52	1	16153	4550	2618	2793		4142	2342	6090	4166
-51	2	849	357	128	191		196	153	387	313
-50	3	614	207	110	79		147	101	210	161
-49	4	76	28	21	10		19	6	41	19
-48	5	76	28	21	17		14	13	35	34
-47	6	41	14	9	6		14	4	23	20
-46	7	93	15	26	33		30	13	35	12
-45	8	42	12	15	6		16	5	24	9
-44	9	329	102	52	53		56	37	148	99
-43	10	125	36	25	26		42	13	47	29
-42	11	145	33	27	23		39	12	55	32
-41	12	195	69	41	42		36	31	91	55
-40	13	93	27	14	35		18	10	65	27
-39	14	837	158	124	80		138	62	331	173
-38	15	535	133	59	82		112	50	236	132
-37	16	255	143	64	59		77	48	118	86
-36	17	128	32	40	17		37	19	60	39
-35	18	133	35	28	17		26	16	24	26
-34	19	44	8	9	5		10	3	16	16
-33	20	313	94	58	46		58	52	110	95
-32	21	117	21	14	26		13	11	48	25
-31	22	406	119	82	56		115	61	126	84
-30	23	89	22	19	28		21	14	47	30
-29	24	178	75	76	38		57	35	77	62
-28	25	79	18	19	13		21	13	46	14
-27	26	356	76	68	62		87	38	189	119
-26	27	9859	2779	1588	1289		2097	1264	6189	3090
-25	28	938	434	295	261		403	292	685	610
-24	29	539	160	116	102		146	86	239	139
-23	30	147	32	32	26		30	25	84	36
-22	31	1356	294	206	153		283	160	632	380
-21	32	840	255	184	182		265	161	500	301
-20	33	1110	383	226	187		317	229	630	364
-19	34	737	196	149	88		181	114	304	226
-18	35	466	109	87	100		105	69	263	156
-17	36	969	214	152	134		145	129	479	347
-16	37	205	47	42	39		58	47	156	90
-15	38	424	99	81	70		82	59	210	131
-14	39	230	61	68	40		64	34	138	84
-13	40	136	44	60	20		33	34	81	58
-12	41	526	161	153	111		161	90	280	222
-11	42	146	65	61	29		60	38	114	76
-10	43	425	99	84	56		120	68	203	149
-9	44	431	119	83	81		121	80	246	171
-8	45	449	122	86	67		93	62	255	187
-7	46	123	23	62	17		31	18	82	63
-6	47	217	63	102	49		100	67	162	129
-5	48	817	224	310	194		369	206	473	360
-4	49	515	174	224	130		274	204	298	230
-3	50	101	19	26	18		24	11	75	44
-2	51	124	28	45	27		33	26	74	59
-1	52	112	25	40	41		28	34	82	91
0	53	384	113	112	52		125	57	197	141
1	54	140	23	50	32		44	33	121	69
2	55	83	16	46	16		26	18	37	39
3	56	78	25	25	13		24	8	52	39
4	57	80	20	32	16		31	18	45	37
5	58	122	40	38	25		43	25	75	52
6	59	191	77	51	28		71	29	87	64
7	60	229	99	94	56		110	86	141	126
8	61	85	26	66	25		40	18	70	55
9	62	79	21	31	22		29	15	49	30
10	63	153	51	49	10		50	31	117	64
11	64	252	65	146	90		205	123	147	98
12	65	150	52	51	27		69	29	91	54
13	66	151	46	35	34		59	30	88	49
14	67	186	46	64	15		62	33	85	62
15	68	359	104	100	44		128	90	175	137
16	69	166	48	66	56		68	50	119	101
17	70	517	133	151	88		170	108	206	135
18	71	212	60	71	49		94	33	111	110
19	72	136	30	79	16		59	34	104	72
20	73	85	22	74	32		72	38	58	39
21	74	139	49	62	25		90	44	100	73
22	75	141	45	63	55		115	68	86	67
23	76	98	46	58	38		62	38	78	58
24	77	66	21	38	19		20	13	66	52
25	78	56	28	22	10		19	12	35	26
26	79	52	23	37	16		30	22	40	36
27	80	167	57	54	44		78	32	94	64
28	81	225	65	58	44		65	38	91	68
29	82	219	53	116	28		83	38	137	119
30	83	168	63	77	65		58	65	140	114
31	84	179	60	63	30		83	51	104	93
32	85	76	21	46	8		40	13	57	26
33	86	344	82	97	25		101	48	176	148
34	87	314	67	120	57		146	78	186	139
35	88	208	74	57	53		82	60	148	145
36	89	845	279	295	214		249	200	514	625
37	90	469	129	122	89		137	104	330	300
38	91	185	48	75	42		75	41	125	131
39	92	103	20	38	11		43	20	70	56
40	93	194	63	44	16		60	44	136	107
41	94	138	40	44	35		52	31	93	60
42	95	270	95	93	71		91	81	253	246
43	96	359	111	89	34		119	73	215	153
44	97	442	140	361	186		347	264	340	417
45	98	139	52	45	32		60	39	119	101
46	99	277	86	93	44		99	66	153	140
47	100	496	136	318	129		315	252	418	530
48	101	120	49	51	29		44	38	107	88
49	102	581	196	164	79		236	172	289	244
50	103	461	139	137	126		122	125	315	417
51	104	453	140	200	96		149	92	282	300
52	105	730	231	208	125		247	184	395	340
53	106	343	87	107	90		99	99	294	297
54	107	1066	376	439	203		431	275	629	599
55	108	313	83	104	46		83	69	210	221
56	109	51	12	12	7		18	9	25	25
57	110	63	27	19	12		20	20	66	52
58	111	235	82	70	27		89	57	144	95
59	112	93	50	32	12		38	21	81	81
60	113	394	140	113	74		139	86	203	198
61	114	517	144	155	89		238	110	321	306
62	115	142	35	49	21		53	40	86	85
63	116	1033	331	375	142		418	219	535	578
64	117	570	185	173	93		229	126	342	332
65	118	199	54	56	30		76	49	142	170
66	119	856	287	335	164		311	224	516	629
67	120	529	170	145	77		211	137	349	378
68	121	298	61	110	67		167	60	210	264
69	122	131	59	40	11		69	31	114	86
70	123	373	131	95	45		135	92	197	205
71	124	1162	470	534	248		604	431	916	1332
72	125	514	194	145	69		195	95	381	369
73	126	445	139	99	51		154	83	221	195
74	127	153	31	46	28		54	30	112	101
75	128	495	183	191	95		176	109	327	375
76	129	317	93	113	68		120	77	215	270
77	130	154	44	37	11		54	31	78	113
78	131	74	44	30	10		49	13	52	69
79	132	167	84	53	25		93	55	162	144
80	133	134	67	52	26		54	45	121	96
81	134	347	133	109	54		148	83	235	226
82	135	643	269	179	90		317	126	321	297
83	136	278	85	96	31		120	44	125	142
84	137	717	310	276	142		344	183	385	430
85	138	730	296	185	91		343	172	383	397
86	139	409	115	144	59		213	94	289	261
87	140	223	92	58	27		109	52	131	142
88	141	328	170	104	46		170	100	204	229
89	142	138	73	45	22		77	38	79	93
90	143	122	59	47	20		62	38	75	79
91	144	671	387	208	96		336	171	385	485
92	145	250	145	101	52		121	69	184	282
93	146	1433	907	621	258		805	377	785	922
94	147	926	459	276	189		463	224	568	699
95	148	374	115	123	44		174	64	114	157
96	149	376	160	84	43		182	73	165	207
97	150	770	324	184	81		468	130	329	346
98	151	612	372	360	189		631	341	366	660
99	152	114	75	45	15		100	34	67	89
100	153	103	74	41	14		71	22	60	63
101	154	84	91	25	18		58	20	57	81
102	155	173	203	48	25		96	37	98	112
103	156	164	166	50	20		118	25	79	126
104	157	182	207	51	15		104	46	82	142
105	158	264	277	54	21		211	78	172	186
106	159	411	303	84	26		253	83	191	186
107	160	64	39	11	3		45	14	27	29
108	161	281	202	58	33		182	51	115	134
109	162	421	368	119	69		259	102	277	408
110	163	235	184	71	61		178	56	174	245
111	164	94	84	25	15		82	13	61	60
112	165	119	112	8	12		80	30	44	54
113	166	124	154	36	24		116	47	66	79
114	167	105	91	19	19		51	18	49	67
115	168	569	482	111	64		404	116	242	280
116	169	118	109	31	28		68	32	69	95
117	170	149	138	24	21		103	34	55	48
118	171	297	282	17	21		230	76	110	67
119	172	508	479	91	119		495	163	200	244
120	173	475	435	84	101		368	143	316	303
121	174	723	608	182	225		428	181	526	759
122	175	155	131	26	48		101	36	102	118
123	176	149	112	23	26		100	23	60	51
124	177	182	182	27	21		157	47	86	53
125	178	286	297	62	139		359	135	144	177
126	179	1880	2207	264	532		1459	529	1434	1390
127	180	967	1028	182	443		755	348	793	968
128	181	121	96	16	64		64	26	63	88
129	182	185	189	27	80		85	41	95	117
130	183	152	113	16	20		107	28	53	40
131	184	113	108	25	70		187	44	45	53
132	185	23	20	0	5		16	4	8	10
133	186	54	71	10	15		50	11	29	18
134	187	31	39	4	7		29	4	13	19
135	188	38	29	1	5		21	5	10	12
136	189	49	55	4	6		45	11	21	23
137	190	35	40	12	19		56	8	15	14
138	191	15	15	2	0		11	3	9	8
139	192	102	81	7	4		72	11	24	27
140	193	33	54	8	6		33	7	14	11
141	194	38	39	7	3		24	3	8	4
142	195	44	50	3	6		43	13	12	14
143	196	12	14	5	6		16	4	3	6
144	197	12	9	1	3		4	0	0	4
145	198	15	34	7	4		18	6	6	5
146	199	43	46	4	2		40	18	18	4
147	200	22	27	0	13		25	6	11	12
148	201	6	7	1	2		7	5	7	3
149	202	13	12	2	1		5	2	7	3
150	203	5	10	4	2		6	1	2	5
151	204	19	36	1	1		27	7	19	7
152	205	29	33	3	5		26	6	10	10
153	206	96	105	21	26		72	22	38	60
154	207	689	674	219	122		427	138	321	383
155	208	152	209	45	127		121	40	91	136
156	209	139	157	36	46		120	30	60	91
157	210	84	90	25	11		75	20	46	55
158	211	38	17	5	5		29	5	20	29
159	212	39	34	16	18		44	11	33	36
160	213	310	251	294	244		329	141	422	387
161	214	401	341	428	393		455	159	568	748

## Sheet: vitro d=6
		-RBP					+RBP
positions_relative_to_AUG	positions	mod cond 1	unmod cond 1	mod cond 2	unmod cond 2		mod cond 1	unmod cond 1	mod cond 2	unmod cond 2
-52	1	1958	2467	1297	886		316	707	828	785
-51	2	89	162	52	53		21	27	32	33
-50	3	53	73	31	12		4	14	16	10
-49	4	38	32	18	18		6	12	22	15
-48	5	21	27	9	13		5	9	17	10
-47	6	15	14	8	4		2	9	8	16
-46	7	27	19	15	8		17	11	21	12
-45	8	15	10	11	7		4	8	15	14
-44	9	59	67	54	32		16	38	42	48
-43	10	30	43	27	17		2	16	20	20
-42	11	36	43	22	24		10	10	10	15
-41	12	64	61	38	29		17	40	43	33
-40	13	31	30	33	27		11	17	26	14
-39	14	63	80	41	33		8	22	25	25
-38	15	86	102	65	41		26	47	45	47
-37	16	40	61	44	31		4	28	23	24
-36	17	22	28	20	9		3	11	9	22
-35	18	29	34	14	9		12	8	18	21
-34	19	4	5	4	2		0	1	3	2
-33	20	46	64	43	26		16	35	35	29
-32	21	27	40	36	22		7	14	24	27
-31	22	105	113	71	67		24	60	58	60
-30	23	29	29	28	23		16	17	41	29
-29	24	43	53	42	31		10	16	26	10
-28	25	14	12	10	11		5	13	12	16
-27	26	53	64	45	39		20	47	38	43
-26	27	479	609	241	272		34	97	117	119
-25	28	146	197	114	110		21	52	48	53
-24	29	135	158	110	83		31	61	69	59
-23	30	42	36	25	26		9	15	21	15
-22	31	316	406	227	214		60	123	132	172
-21	32	522	434	255	225		114	184	232	187
-20	33	259	304	143	139		50	107	92	134
-19	34	197	235	150	127		24	99	91	112
-18	35	277	249	175	196		65	131	130	123
-17	36	159	186	144	109		42	94	87	89
-16	37	56	56	58	42		27	47	76	65
-15	38	102	84	66	54		31	49	55	56
-14	39	38	36	37	22		13	17	22	15
-13	40	58	45	28	20		15	23	29	22
-12	41	140	98	84	50		52	64	91	56
-11	42	40	27	37	19		7	15	41	18
-10	43	115	149	94	74		42	70	104	76
-9	44	133	126	90	116		44	72	69	81
-8	45	83	71	73	58		25	42	46	30
-7	46	15	18	13	17		3	11	15	6
-6	47	42	43	51	28		17	31	32	21
-5	48	192	220	168	142		54	83	131	110
-4	49	91	96	75	86		11	43	46	50
-3	50	14	15	22	9		7	8	12	12
-2	51	24	35	26	20		9	19	10	12
-1	52	51	62	59	38		10	29	34	33
0	53	131	145	95	67		21	65	66	56
1	54	64	87	61	46		21	42	44	42
2	55	11	13	9	7		6	4	6	2
3	56	21	24	28	14		13	14	19	13
4	57	25	37	39	12		22	20	30	25
5	58	39	60	34	23		44	24	33	32
6	59	39	53	36	32		16	29	25	20
7	60	48	69	47	37		25	31	39	32
8	61	13	21	37	19		10	24	21	14
9	62	22	29	28	17		16	18	25	13
10	63	61	57	58	30		32	31	46	35
11	64	69	78	36	28		21	19	46	17
12	65	88	108	80	59		50	65	78	53
13	66	67	70	61	39		12	30	41	23
14	67	78	77	57	42		18	25	23	22
15	68	184	186	127	118		47	52	57	61
16	69	288	354	274	235		29	65	73	56
17	70	365	394	279	216		52	73	89	60
18	71	302	368	320	257		30	48	42	39
19	72	55	35	51	34		10	7	14	6
20	73	47	39	54	49		17	15	36	13
21	74	147	134	138	87		44	61	71	64
22	75	80	108	104	74		17	41	23	31
23	76	286	388	159	96		18	90	96	22
24	77	22	25	20	24		14	12	10	11
25	78	11	16	7	2		7	13	6	9
26	79	17	18	16	10		7	10	13	8
27	80	59	79	59	36		22	31	35	28
28	81	79	88	67	64		20	39	40	32
29	82	67	55	57	40		21	25	35	28
30	83	1369	737	403	94		35	108	114	39
31	84	182	232	186	159		51	100	107	83
32	85	39	48	25	16		8	26	28	18
33	86	124	133	127	109		65	76	98	54
34	87	156	121	127	82		22	68	58	65
35	88	300	308	274	233		88	136	126	133
36	89	677	708	607	553		99	274	259	282
37	90	221	260	257	202		66	121	137	114
38	91	106	119	124	75		26	52	62	47
39	92	46	49	44	34		23	34	46	23
40	93	76	78	66	58		41	47	68	43
41	94	72	72	49	57		36	42	61	43
42	95	80	84	54	44		15	34	40	39
43	96	138	158	139	88		49	84	98	56
44	97	283	281	198	162		38	74	83	60
45	98	79	87	73	67		34	63	65	44
46	99	115	100	92	71		36	57	90	51
47	100	141	119	80	56		65	63	73	49
48	101	48	45	47	35		28	32	50	29
49	102	311	314	204	167		144	184	202	167
50	103	252	250	226	190		81	115	140	93
51	104	173	196	180	137		40	63	90	69
52	105	320	362	263	195		111	176	157	131
53	106	210	193	172	142		63	98	121	97
54	107	568	584	488	392		115	242	275	219
55	108	142	128	126	75		47	51	61	45
56	109	12	3	3	4		1	3	3	4
57	110	27	22	30	25		20	29	20	23
58	111	59	62	56	47		35	40	50	45
59	112	44	39	24	23		8	17	24	20
60	113	132	157	109	84		64	50	81	58
61	114	269	262	220	169		130	165	173	125
62	115	37	38	30	29		6	17	21	11
63	116	537	524	379	309		140	239	250	193
64	117	358	365	309	252		174	247	259	168
65	118	91	78	66	52		13	22	44	33
66	119	1074	993	974	863		241	495	548	486
67	120	337	305	352	284		118	202	200	156
68	121	105	99	92	65		25	41	55	31
69	122	61	58	49	44		43	42	63	31
70	123	95	80	78	67		51	68	85	47
71	124	233	253	152	154		39	72	84	50
72	125	225	242	168	145		128	154	185	123
73	126	202	190	126	111		62	80	100	91
74	127	33	39	36	22		10	16	22	25
75	128	274	266	244	229		95	124	151	120
76	129	158	173	137	118		57	103	125	80
77	130	25	28	24	12		11	15	16	10
78	131	37	27	17	29		23	21	39	12
79	132	34	26	28	19		21	18	40	21
80	133	67	69	52	36		22	37	45	32
81	134	160	137	110	86		77	66	91	59
82	135	435	434	359	323		183	236	261	202
83	136	139	106	97	105		38	55	62	47
84	137	602	602	477	420		189	323	319	225
85	138	366	349	306	266		129	222	250	160
86	139	164	151	120	97		58	97	98	66
87	140	129	157	101	100		76	96	103	69
88	141	185	160	142	156		102	132	152	86
89	142	34	34	18	15		16	21	23	4
90	143	87	82	68	89		61	63	89	48
91	144	447	423	316	278		190	265	256	180
92	145	287	241	298	258		154	233	261	172
93	146	1378	1353	1098	1081		527	761	829	570
94	147	1284	1191	1181	1186		557	1035	965	673
95	148	134	114	135	109		36	71	88	63
96	149	326	327	275	303		200	363	274	168
97	150	407	339	326	349		197	301	237	152
98	151	367	350	296	305		116	176	178	155
99	152	49	51	50	37		18	24	42	30
100	153	44	50	37	51		28	44	40	31
101	154	45	69	47	50		32	44	53	38
102	155	70	74	62	56		50	62	73	43
103	156	48	40	29	38		30	31	46	24
104	157	44	47	63	56		43	53	47	34
105	158	120	84	80	78		66	76	66	47
106	159	243	232	242	235		156	197	201	128
107	160	17	23	12	14		5	12	13	8
108	161	215	198	205	236		159	194	173	120
109	162	493	529	540	567		391	457	423	335
110	163	311	296	358	349		257	344	278	230
111	164	27	33	47	49		26	35	25	21
112	165	38	30	42	52		21	31	37	22
113	166	83	60	87	120		69	67	72	50
114	167	57	48	60	69		49	49	63	35
115	168	268	266	279	267		157	208	204	149
116	169	107	135	135	162		109	145	125	102
117	170	71	79	59	59		53	62	52	43
118	171	140	109	124	124		106	116	101	72
119	172	309	336	288	366		118	178	164	130
120	173	513	478	455	525		308	393	371	223
121	174	1043	1085	1219	1235		940	1135	952	776
122	175	172	192	173	180		104	170	158	112
123	176	167	149	167	171		129	151	175	119
124	177	177	198	155	152		177	198	153	114
125	178	426	475	408	394		268	365	294	239
126	179	1523	1620	1146	1226		597	937	622	556
127	180	2111	2159	2208	2098		2773	3027	2301	1671
128	181	222	233	250	211		286	318	246	193
129	182	698	751	775	658		1361	1342	1109	628
130	183	238	227	179	177		316	396	213	158
131	184	239	299	199	203		201	266	180	118
132	185	20	21	20	16		26	42	20	16
133	186	53	59	17	31		36	51	34	21
134	187	53	49	40	45		53	76	50	41
135	188	34	39	23	23		37	39	28	19
136	189	72	79	42	36		65	67	45	29
137	190	67	77	53	48		51	75	46	33
138	191	6	8	12	5		10	8	9	3
139	192	40	26	27	23		32	34	34	26
140	193	38	31	18	12		37	41	24	20
141	194	23	23	12	13		25	28	19	11
142	195	43	37	20	33		39	40	35	24
143	196	10	10	8	13		14	13	4	5
144	197	9	12	6	4		6	5	5	9
145	198	3	5	8	5		4	11	4	4
146	199	25	20	9	11		17	17	16	10
147	200	47	93	68	31		128	140	70	44
148	201	3	2	3	2		6	7	7	3
149	202	9	7	5	2		4	5	5	4
150	203	1	4	7	2		8	3	3	1
151	204	16	9	4	3		5	10	13	9
152	205	24	25	6	13		16	31	21	15
153	206	88	102	72	73		131	132	116	90
154	207	646	706	329	414		774	815	590	395
155	208	485	589	470	430		1601	1503	1040	645
156	209	377	413	335	366		1444	1258	756	395
157	210	62	78	58	65		205	194	101	80
158	211	20	34	23	26		58	62	46	33
159	212	34	21	35	28		50	73	77	37
160	213	801	844	1026	943		1583	1646	1396	1028
161	214	989	956	915	805		2059	2013	1559	941
